# Supplementary material
Source: Springer Nature journal article supplement (https://www.springermedizin.de/resource/supplementary/12902_2014_312_MOESM6_ESM.pdf/9515938)

Mixed genders

—■— control vehicle  
- -■- - control vitamin

- -▲- - diabetes vehicle  
- ·▲- · diabetes vitamin

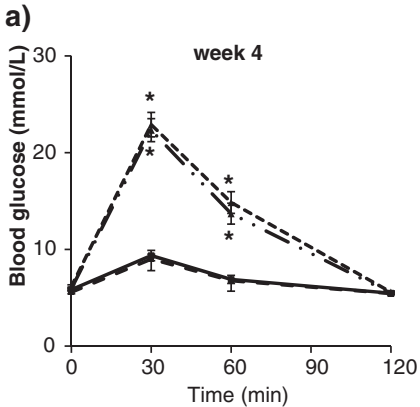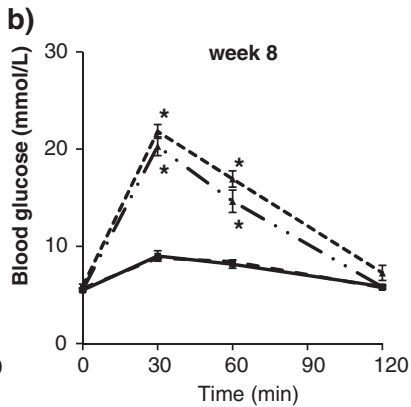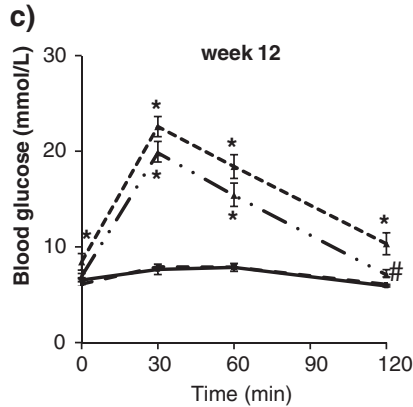

Supplement: MOESM6 [file 9515938]
